# Supplementary material
Source: Springer Nature journal article supplement (https://www.springermedizin.de/resource/supplementary/12884_2013_809_MOESM1_ESM.pdf/9458254)
Supplement: MOESM1 [file 9458254]

## Innovation determinants

Characteristics of the innovation

Characteristics of the adopting person (user)

Characteristics of the organisation

Characteristics of the socio-political context

Characteristics of the innovation strategy

## Innovation process

Dissemination

Adoption

Implementation

Continuation
